# Supplementary material for: Low-temperature synthesis of CaZrTi2O7 zirconolite-type materials using ceramic, coprecipitation, and sol–gel methods
Source: Royal Society of Chemistry journal article supplement (doi:10.1039/c8tc04560g), 2018-12-04
Supplement: c8tc04560g1.pdf [file c8tc04560g1.pdf]

# **Low-temperature synthesis of $\text{CaZrTi}_2\text{O}_7$ zirconolite-type materials using ceramic, coprecipitation, and sol-gel methods**

*Sarah McCaugherty, Andrew P. Grosvenor\**

Department of Chemistry, University of Saskatchewan, Saskatoon, SK, Canada, S7N 5C9

## **Supplemental Information**

\* Author to whom correspondence should be addressed

E-mail: [andrew.grosvenor@usask.ca](mailto:andrew.grosvenor@usask.ca)

**Table S1** Synthesis conditions of ion implanted materials and the glancing angles studied by Ti K-edge GA-XANES.

| <b>Material</b>                    | <b>Synthesis Method</b> | <b>Annealing Temperature</b> | <b>Total Annealing Time</b> | <b>Glancing Angles/Depths Studied</b> |
|------------------------------------|-------------------------|------------------------------|-----------------------------|---------------------------------------|
| CaZrTi <sub>2</sub> O <sub>7</sub> | Ceramic                 | 1400 °C                      | 12 days                     | 0.8°/100 nm<br>3.1°/500 nm            |
|                                    | Coprecipitation         | 1200 °C                      | 9 days                      |                                       |
|                                    | Sol-gel                 | 1200 °C                      | 9 days                      |                                       |

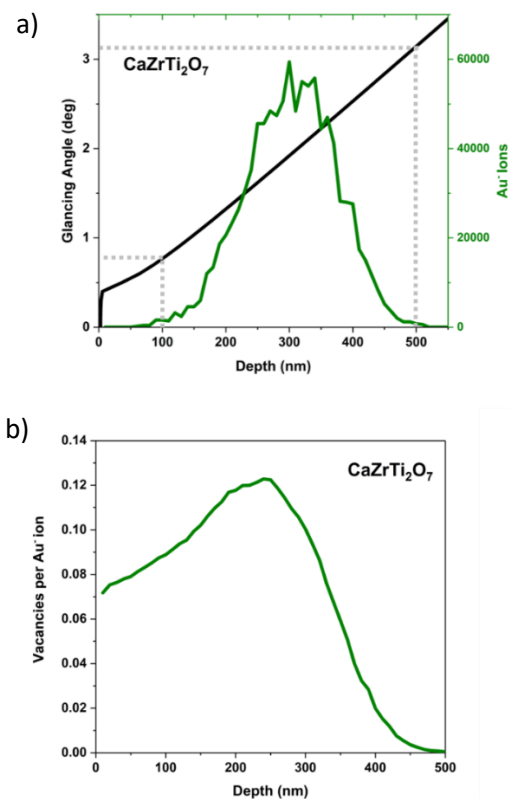

**Figure S1** Ion implantation depth and X-ray attenuation depth for the  $\text{CaZrTi}_2\text{O}_7$  materials are shown in (a). The number of vacancies produced per  $\text{Au}^+$  ion in the  $\text{CaZrTi}_2\text{O}_7$  materials is shown in (b). The dotted lines present in (a) relate the glancing angle to the attenuation length of X-rays having an energy of 4966 eV.

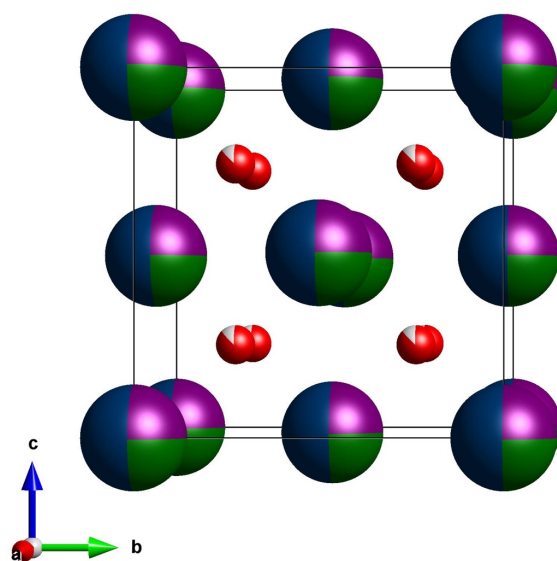

**Figure S2** Skeletal representation of the defect fluorite-type structure as determined by Rietveld refinement of the diffraction pattern from the  $\text{CaZrTi}_2\text{O}_7$  sample synthesized by the co-precipitation method and annealed at 700 °C. The purple portion of the spheres represent  $\text{Ca}^{2+}$ , the green portion of the spheres represent  $\text{Zr}^{4+}$ , the blue portion of the spheres represent  $\text{Ti}^{4+}$ , the red portion of the spheres represent  $\text{O}^{2-}$ , and the white portion of the spheres represents the random oxygen vacancies present within this structure.

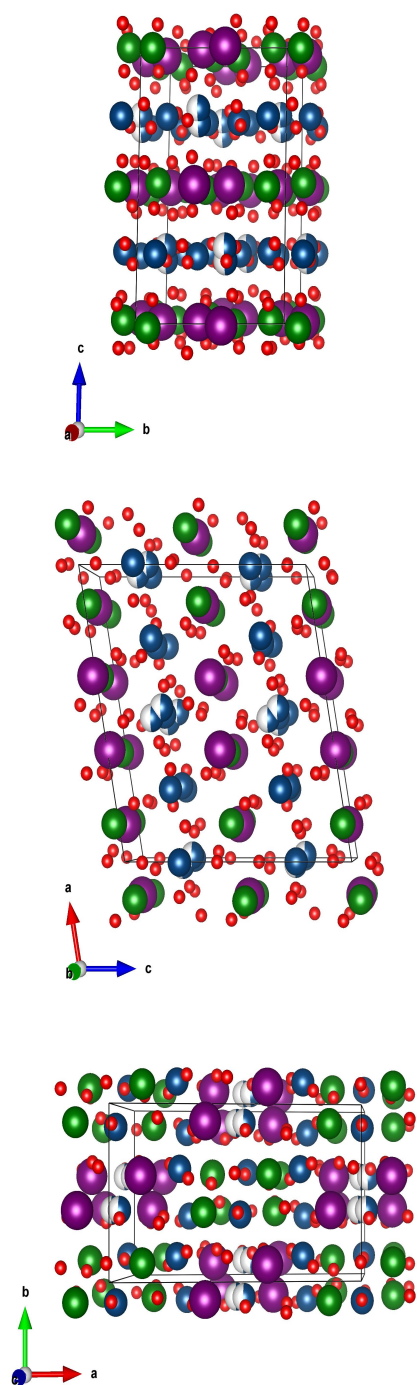

**Figure S3** Skeletal representation of the zirconolite-type structure as determined by Rietveld refinement of the diffraction pattern from the  $\text{CaZrTi}_2\text{O}_7$  sample synthesized by the co-precipitation method and annealed at 900 °C. The purple spheres represent  $\text{Ca}^{2+}$ , the green spheres represent  $\text{Zr}^{4+}$ , the blue spheres represent  $\text{Ti}^{4+}$ , and the red spheres represent  $\text{O}^{2-}$ .
